# Supplementary material for: Thermophilic films and fibers from photo cross-linkable UCST-type polymers
Source: Royal Society of Chemistry journal article supplement (doi:10.1039/c5py00109a), 2015-01-01
Supplement: c5py00109a1.pdf [file c5py00109a1.pdf]

Supporting information for

## Thermophilic films and fibers from photo cross-linkable UCST-type polymers

Fangyao Liu<sup>a</sup>, Shaohua Jiang<sup>a</sup>, Leonid Ionov<sup>b</sup>, Seema Agarwal<sup>a\*</sup>

<sup>a</sup>: University of Bayreuth, Macromolecular Chemistry II and Bayreuth Center for Colloids and Interfaces, Universitätstrasse 30, D-95440 Bayreuth, Germany

<sup>b</sup>: Leibniz Institute of Polymer Research Dresden, Hohe Str.6, D-01069 Dresden, Germany

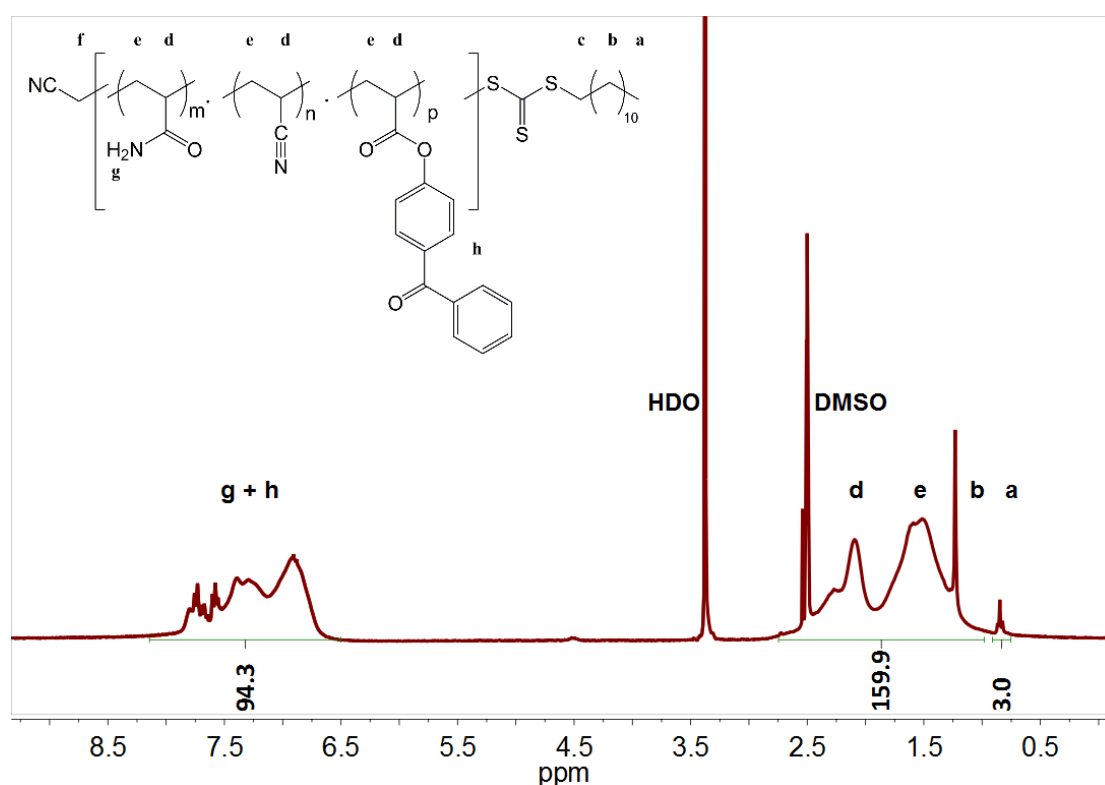

Figure S1. <sup>1</sup>H NMR spectra of RAFT poly(AAm-AN-BPA) (table 1, entry 7, monomer in feed= 92:6:2). The spectra were measured in DMSO-*d*<sub>6</sub> at 60 °C. Protons from amide and BPA overlap at 6.5 -7.5 ppm making it not possible to determine the polymer composition.

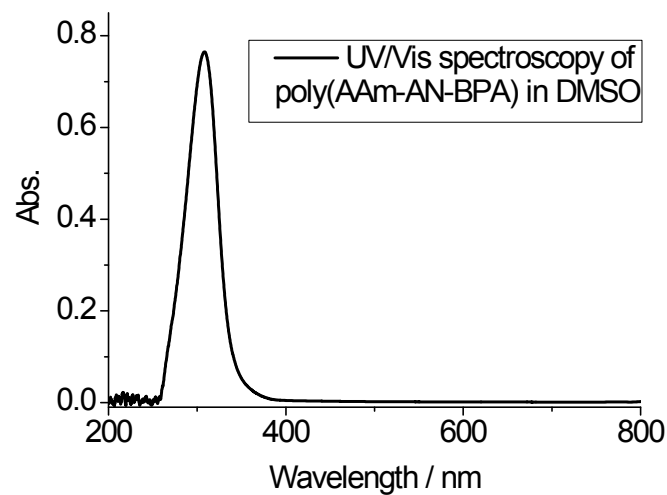

Figure S2. UV/Vis spectroscopy of RAFT poly(AAm-AN-BPA) (table 1, entry 7, monomer in feed= 92:6:2) in DMSO.

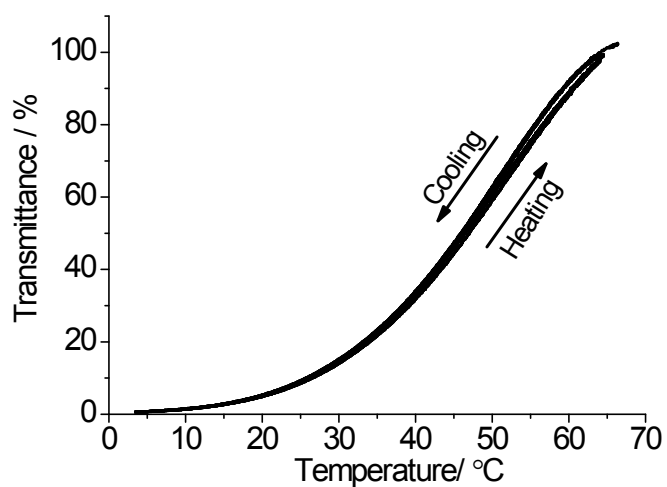

Figure S3. Turbidity measurements of 0.1 wt.% solution of poly(AAm-AN-BPAm) made by FRP using V-70 as initiator. (Table 2 entry 2, AAm : AN : BPAm = 88 : 10 : 2,  $M_n$  = 60 kDa, PDI = 1.5).
